# Supplementary material
Source: Springer Nature journal article supplement (https://www.springermedizin.de/resource/supplementary/12906_2010_303_MOESM1_ESM.pdf/9519380)
Supplement: MOESM1 [file 9519380]

179 DICCP  
39 DACCP  
218 chiropractors  
with a diplomate  
in pediatrics

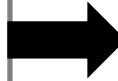

1 excluded- author

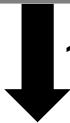

1<sup>st</sup> Mailing- 217 letters with survey url

56 responses: 25.8%

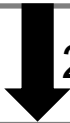

2<sup>nd</sup> Mailing- 161 letters with survey url

24 responses: 11.1%

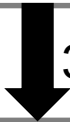

3<sup>rd</sup> Mailing- 138 letters with survey url  
and hard copy of survey

55 responses: 25.3%  
**Total 135: 62.2%**
